# Supplementary material
Source: PubMed Central journal article supplement (PMC10142876)
Supplement: btab670_supplementary_data.pdf [file btab670_supplementary_data.pdf]

## 5 Supplementary Methods

### 5.1 Internal-external cross-validation

Training and testing data were separated at the level of hospitals/institutions (Fig. S1). To balance the size of various folds, we made sure each fold contained at least one “large” institution. Large institutions were defined as those having a minimum of 9 unique patients.

### 5.2 NuCLS model

Our NuCLS model modifies the Pytorch implementation of the Mask R-CNN architecture (He et al., 2017).

#### 5.2.1 Hyperparameters

We used a ResNet18 backbone that was pretrained on ImageNet. Single-GPU training was done using a batch size of 4, using a stochastic gradient descent optimiser with a learning rate of  $2e-3$  and a momentum of  $9e-1$ . The learning rate and momentum were identified using grid search on the validation dataset during prototyping. All ground truth nuclei were kept per image at training, while detections were limited to a maximum of 300 nuclei at inference. 3,000 anchors were kept from the region proposal network after non-maximum suppression (NMS), using an NMS threshold of 0.7. The length of anchor sides used in pixels (relative to upsampled images, see below) is 12, 24 and 48.

#### 5.2.2 Resize using scale factor

Mask R-CNN resizes input images to have a constant short side. While this may work for datasets where the variability in image size is modest, or where the camera distance is variable, it is not suitable in computational pathology applications where large tile sizes are favorable for efficient and scalable inference. Resizing to a constant short side would shrink nuclei during inference. To remedy this NuCLS resizes using a scale factor, instead, thus preserving the nuclear size and aspect ratio at inference for any tile size. We used a scale factor of 4.0, meaning that images were digitally zoomed to a 0.05 micron-per-pixel resolution before being analyzed. This corresponded to a sTILs diameter of 4.4 “pixels” in the feature map generated by the ResNet18 backbone. As a form of scale augmentation, we jittered this scale factor by up to 10% during training.

#### 5.2.3 Training with hybrid datasets

Our annotation protocol generates a mixture of manually placed bounding boxes and approved suggestions of segmented nuclei. We train from this data by ignoring bounding boxes when calculating the mask loss.

#### 5.2.4 Specialized classification convolutions

Four extra convolutional filters were applied to the feature map output from the ResNet18 backbone (He et al., 2016). The filters had a kernel size of 3, a stride of 1, and a dilation and padding of 1 to preserve feature map size (Fig. 4a). The resultant feature map was only used for classification and only contributed to the classification loss. The same procedure used for box regression was used for classification: 1. ROIAlign to obtain per-object convolutional feature maps; 2. flattening of the feature map; 3. passage through a single fully-connected layer.

#### 5.2.5 Class-agnostic detection & segmentation

Both the box regression output and nucleus masks were simplified and made classification-agnostic. We relied on the fact that nucleus shapes and sizes are fairly homogeneous to simplify the learning problem and preserve classification probability vectors at inference. Specifically, we relied on a global NMS process (Fig. 4b). We summed the classification probabilities for all classes (i.e. everything except background), and concatenated all these “objectness” scores for each FOV. An NMS process was then carried

out as usual. That is, boxes were sorted by objectness score, and if a box overlapped with a higher-scoring box by more than a particular IOU threshold (0.2 in our case), it was removed.

#### 5.2.6 Data augmentation

Previous research has shown that the combined use of color normalization and augmentation improves performance of deep learning models in histopathology applications (Tellez et al., 2019). All FOVs were color normalized using the Macenko method before training began (Macenko et al., 2009). During training, FOVs also underwent a stain augmentation routine (Tellez et al., 2018). This augmentation routine randomly perturbed the hematoxylin and eosin channels each time the image was loaded, using a sigma of 0.5 for the random uniform distribution. The HistomicsTK package was used for both the color normalization and augmentation operations (digitalslidearchive.github.io). Additionally, each training image was cropped at a random location after loading to memory ( $300 \times 300$  pixel region) to increase robustness.

#### 5.2.7 Handling class imbalance

Nucleus class imbalance was mitigated by weighted random sampling with replacement. With the exception of ambiguous nuclei, which received zero weight, class weights were inversely proportional to the frequency of occurrence in the training set. Since we load data on a per-FOV basis, each FOV  $f$  was assigned a sampling weight  $W_f$  that favors FOVs with a high density of uncommon nuclear classes, as follows:

$$W_f = U_f \div \sum_{i=1}^F U_i \quad (1)$$

$$U_f = \sum_{c=1}^C (W_c N_{cf}) \div A_f \quad (2)$$

Where,  $C$  is the number of classes,  $F$  is the number of FOVs in the training set,  $N_{cf}$  is the number of nuclei of class  $c$  in FOV  $f$ , and  $A_f$  is the area of FOV  $f$ .  $W_c$  is the weight assigned to class  $c$  and is determined as follows:

$$W_c = V_c \div \sum_{i=1}^C V_i \quad (3)$$

$$V_c = 1 \div \sum_{f=1}^F N_{cf} \quad (4)$$

#### 5.2.8 Matching detections

Algorithmic detections were matched to ground truth using linear sum assignment from the Scipy library (Kuhn, 1955).

## Supplementary Tables

Table S1. NuCLS model tuning for the nucleus detection task on the validation set (fold 1). All accuracy values are percentages. After passage through the model backbone, the feature map is markedly smaller than original images due to the max pooling operations. This means that without digital zooming, the diameter of a ‘typical’ small nucleus, say TILs, is very small in the feature map. As a consequence, when the object-specific part of the feature map is pooled using ROIAlign, there is very little information to use for box regression or classification. Abbreviations: MPP, microns-per-pixel; AP@0.5, average precision when a threshold of 0.5 is used for validating a detection.

| Scale factor | Equivalent MPP | Backbone | TILs diameter (image, pixels) | TILs diameter (featmap, ‘pixels’) | AP @ 0.5 |
|--------------|----------------|----------|-------------------------------|-----------------------------------|----------|
| 1            | 0.2            | Resnet18 | 30                            | 1.1                               | 61.7     |
| 1            | 0.2            | Resnet34 | 30                            | 1.1                               | 63       |
| 1            | 0.2            | Resnet50 | 30                            | 1.1                               | 62       |
| 2.67         | 0.075          | Resnet18 | 80                            | 3                                 | 76.4     |
| 2.67         | 0.075          | Resnet34 | 80                            | 3                                 | 74.3     |
| 2.67         | 0.075          | Resnet50 | 80                            | 3                                 | Mem.Err. |
| 4            | 0.05           | Resnet18 | 120                           | 4.4                               | 75       |
| 4            | 0.05           | Resnet34 | 120                           | 4.4                               | 72.9     |
| 4            | 0.05           | Resnet50 | 120                           | 4.4                               | Mem.Err. |

Table S2. NuCLS model tuning for the nucleus classification task on the validation set (fold 1). All accuracy values are percentages. Empty entries correspond to metrics which were not applicable for the configuration (config) being studied. Classification AUROC statistics were not possible for configs where each nucleus had a single classification as opposed to a classification probability vector, as in the baseline Mask R-CNN model. The baseline model achieves a lower performance. We show that this is due in large part to the coupling of detection and classification, which may not be ideal for datasets with many small and clustered objects. After decoupling, the performance dramatically improves. Configs where the model was trained on super-classes do not have accuracy statistics for the main classes. On the other hand, when models were trained on the main classes, super-class predictions were easily obtained by aggregating the predicted class probabilities.

| Config | Detection<br>AP @.5 | Overall classification accuracy |           |             |             |             |             | Classification accuracy breakdown (AUROC) |             |             |             |             |             |             |             |             |
|--------|---------------------|---------------------------------|-----------|-------------|-------------|-------------|-------------|-------------------------------------------|-------------|-------------|-------------|-------------|-------------|-------------|-------------|-------------|
|        |                     | MCC                             |           | Micro       |             | Macro       |             | Tumor                                     |             |             | Stromal     |             |             | sTILs       |             |             |
|        |                     | Supercl.?                       |           | Supercl.?   |             | Supercl.?   |             | Subclasses                                |             | Superclass  | Subclasses  |             | Superclass  | Subclasses  |             | Superclass  |
|        |                     | No                              | Yes       | No          | Yes         | No          | Yes         | Non-mitotic                               | Mitotic     |             | Stromal     | Macrophage  |             | Lymphocyte  | Plasma cell |             |
| 1      | 70                  | 1.8                             | -3        | -           | -           | -           | -           | -                                         | -           | -           | -           | -           | -           | -           | -           | -           |
| 2      | 74.5                | 57                              | 65        | 93.4        | <b>94.3</b> | <b>85.2</b> | <b>88.2</b> | 93.1                                      | <b>91.5</b> | 93.2        | 88.8        | 71          | <b>83.6</b> | 95          | 78.6        | 95          |
| 3      | <b>75.4</b>         | <b>59.6</b>                     | <b>66</b> | <b>93.5</b> | 93.7        | 84.7        | 85.2        | <b>94.2</b>                               | 90.6        | <b>94.5</b> | <b>89.1</b> | <b>73.5</b> | 82          | <b>95.2</b> | 84.2        | <b>95.7</b> |
| 4      | 72.2                | 52.6                            | 60.9      | 91          | 92.3        | 82.4        | 83.6        | 92.5                                      | 90.8        | 92.1        | 86.7        | 61.7        | 78.9        | 94.7        | 82.9        | 93.4        |
| 4+     | 72.2                | 54.5                            | 62.5      | 90.3        | 91.9        | 84.1        | 85.8        | 92.2                                      | 88.5        | 92          | 88.1        | 68.4        | 81.5        | 93.7        | <b>84.4</b> | 93.4        |
| 5      | 72.6                | -                               | -5        | -           | -           | -           | -           | -                                         | -           | -           | -           | -           | -           | -           | -           | -           |
| 6      | 74.8                | -                               | 63.6      | -           | 93.5        | -           | 85.9        | -                                         | -           | 92.8        | -           | -           | 81.3        | -           | -           | 95          |
| 7      | 72.2                | -                               | 63.1      | -           | 93.1        | -           | 82.8        | -                                         | -           | 91.9        | -           | -           | 81          | -           | -           | 94.9        |
| 7+     | 72.2                | -                               | 64.8      | -           | 92.7        | -           | 83.7        | -                                         | -           | 93.1        | -           | -           | 83.1        | -           | -           | 94.8        |

**Config 1:** Baseline Mask R-CNN implementation. We discounted bounding boxes from the mask loss to enable training on our hybrid data.

**Config 2:** Config 1, but with class-agnostic detection and non-maximum suppression.

**Config 3:** Config 2, but with 4 extra convolutions that specialize in classification.

**Config 4:** Config 1 for nucleus detection, then an independent nucleus classification model using thumbnails of detected nuclei.

**Config 4+:** Same model from config 4, but with test-time augmentation (random shift) at the classification stage.

**Config 5:** Config 1 but trained using supercategories.

**Config 6:** Config 2 but trained using supercategories.

**Config 7:** Config 4 but trained using supercategories.

**Config 7+:** Same model from config 7, but with test-time augmentation (random shift) at the classification stage.

Table S3. Generalization accuracy of the NuCLS models trained on the corrected single-rater dataset, and evaluated on the multi-rater dataset using internal-external cross-validation. All accuracy values are percentages. Fold 1 acted as the validation set for hyperparameter tuning, so the bottom row shows mean and standard deviation of three values (folds 3-5). Note that the number of testing set nuclei varied by fold because the split happens at the level of hospitals and not nuclei. There were no testing set slides with available multi-rater truth to assess the performance on fold 2. Notice that the classification accuracy is consistently higher when the assessment was done at the level of super-classes. Abbreviations: AP@.5, average precision when a threshold of 0.5 is used for considering a detection to be true; mAP@.5:.95, mean average precision at detection thresholds between 0.5 and 0.95.

| Fold          | Detection |            |             | Segmentation |               |               | Classification |                |            |             |               |               |
|---------------|-----------|------------|-------------|--------------|---------------|---------------|----------------|----------------|------------|-------------|---------------|---------------|
|               | N         | AP @.5     | mAP @.5:.95 | N            | Median IOU    | Median DICE   | N              | Super-classes? | Accuracy   | MCC         | AUROC (micro) | AUROC (macro) |
| 1<br>(Val.)   | 209       | 62.9       | 21.0        | 42           | 67.6          | 80.7          | 173            | No             | 70.5       | 63.6        | 94.2          | 85.6          |
|               |           |            |             |              |               |               |                | Yes            | 86.1       | 79.0        | 95.7          | 95.6          |
| 3             | 66        | 65.2       | 29.0        | 7            | 76.9          | 86.9          | 52             | No             | 63.5       | 42.4        | 80.7          | 85.5          |
|               |           |            |             |              |               |               |                | Yes            | 61.5       | 42.5        | 75.1          | 84.7          |
| 4             | 317       | 71.5       | 32.6        | 82           | 76.2          | 86.5          | 278            | No             | 68.0       | 54.3        | 94.3          | 89.3          |
|               |           |            |             |              |               |               |                | Yes            | 84.9       | 75.5        | 96.9          | 92.0          |
| 5             | 213       | 58.3       | 22.9        | 49           | 71.8          | 83.6          | 174            | No             | 67.8       | 55.8        | 92.2          | 90.4          |
|               |           |            |             |              |               |               |                | Yes            | 75.3       | 65.6        | 91.4          | 95.2          |
| Mean<br>(Std) | -         | 65.0 (5.4) | 28.2 (4.0)  | -            | 74.9<br>(2.3) | 85.7<br>(1.5) | -              | No             | 66.4 (2.1) | 50.8 (6.0)  | 89.1 (6.0)    | 88.4 (2.1)    |
|               |           |            |             |              |               |               |                | Yes            | 73.9 (9.6) | 61.2 (13.8) | 87.8 (9.2)    | 90.6 (4.4)    |

Table S4. Generalization accuracy of the trained NuCLS models - broken down by superclass. All accuracy values are percentages. Note that the corrected single-rater dataset is likely more reflective of the generalization accuracy, since it contains 1,744 unique FOVs. The multi-rater dataset only has 52 unique FOVs, hence the large variation in performance.

| Fold                                                          | N     | MCC         |             |             |            | AUROC      |            |            |            |            |
|---------------------------------------------------------------|-------|-------------|-------------|-------------|------------|------------|------------|------------|------------|------------|
|                                                               |       | Overall     | Tumor       | Stromal     | sTILs      | Micro-avg. | Macro-avg. | Tumor      | Stromal    | sTILs      |
| Training: Single-rater dataset; Testing: Single-rater dataset |       |             |             |             |            |            |            |            |            |            |
| 1 (Val.)                                                      | 5351  | 65.2        | 72.9        | 47.1        | 73.7       | 93.7       | 89.0       | 94.2       | 83.2       | 95.3       |
| 2                                                             | 13597 | 68.2        | 73.7        | 53.0        | 76.6       | 94.6       | 86.5       | 94.5       | 87.4       | 96.2       |
| 3                                                             | 11176 | 68.1        | 74.9        | 46.9        | 77.9       | 94.4       | 89.4       | 96.1       | 84.3       | 95.7       |
| 4                                                             | 7288  | 73.5        | 80.6        | 56.9        | 79.6       | 96.1       | 87.4       | 97.2       | 89.1       | 95.9       |
| 5                                                             | 6294  | 52.4        | 57.4        | 40.7        | 60.1       | 89.0       | 80.8       | 88.8       | 80.7       | 91.0       |
| Mean (Std)                                                    | -     | 65.6 (7.9)  | 71.7 (8.6)  | 49.4 (6.1)  | 73.5 (7.8) | 93.5 (2.7) | 86.0 (3.2) | 94.2 (3.2) | 85.4 (3.2) | 94.7 (2.1) |
| Training: Single-rater dataset; Testing: Multi-rater dataset  |       |             |             |             |            |            |            |            |            |            |
| 1 (Val.)                                                      | 173   | 79.0        | 88.0        | 73.0        | 78.6       | 95.7       | 95.6       | 97.7       | 94.4       | 95.5       |
| 3                                                             | 52    | 42.5        | 38.5        | 26.3        | 73.9       | 75.1       | 84.7       | 87.1       | 83.0       | 90.9       |
| 4                                                             | 278   | 75.5        | 77.8        | 53.1        | 90.2       | 96.9       | 92.0       | 96.4       | 91.9       | 99.2       |
| 5                                                             | 174   | 65.6        | 60.0        | 67.1        | 72.1       | 91.4       | 95.2       | 96.6       | 92.2       | 97.9       |
| Mean (Std)                                                    | -     | 61.2 (13.8) | 58.8 (16.1) | 48.8 (16.9) | 78.8 (8.2) | 87.8 (9.2) | 90.6 (4.4) | 93.4 (4.4) | 89.0 (4.3) | 96.0 (3.6) |

Table S5. List of interpretable features used as input for DTALE, which were extracted using the HistomicsTK package.

| Category  | N  | Description                                                                 | Feature      | Category                  | N | Description                                               | Feature     |
|-----------|----|-----------------------------------------------------------------------------|--------------|---------------------------|---|-----------------------------------------------------------|-------------|
| Size      | 4  | Pixels occupied by the nucleus                                              | Area         | Edges                     | 8 | Gradients and canny edge filters (hematoxylin channel)    | Mag.Mean    |
|           |    | Length of major/minor axes of the ellipse with the same 2nd central moments | MajorAxis    |                           |   |                                                           | Mag.Std     |
|           |    | Pixelated perimeter using 4-connectivity                                    | MinorAxis    |                           |   |                                                           | Mag.Skew    |
|           |    |                                                                             | Perimeter    |                           |   |                                                           | Mag.Kurt.   |
| Shape     | 6  | Similarity to the shape of a circle                                         | Circularity  |                           |   |                                                           | His.Entropy |
|           |    | Eccentricity of fitted ellipse (a measure of aspect ratio)                  | Eccentricity |                           |   |                                                           | His.Energy  |
|           |    | Diameter of a circle with the same area                                     | Equiv.Diam.  |                           |   |                                                           | Canny.Sum   |
|           |    | Ratio of nucleus area to its bounding box                                   | Extent       |                           |   |                                                           | Canny.Mean  |
|           |    | Aspect ratio of a fitted ellipse                                            | Min.Maj.Axis |                           |   |                                                           | Mean        |
|           |    | A measure of convexity                                                      | Solidity     |                           |   |                                                           | Range       |
|           | 6  | Fourier simplifications of object shape.                                    | FSD1         | Haralick texture features | 2 | Angular 2nd moment (ASM): A measure of homogeneity        | Mean        |
|           |    |                                                                             | FSD2         |                           | 2 | Contrast: Intensity variation for neighbouring pixels     | Range       |
|           |    |                                                                             | FSD3         |                           | 2 | Correlation: Intensity correlation for neighboring pixels | Mean        |
|           |    |                                                                             | FSD4         |                           | 2 | Sum of squares: A measure of variance                     | Range       |
|           |    |                                                                             | FSD5         |                           | 2 |                                                           | Mean        |
|           |    |                                                                             | FSD6         |                           | 2 |                                                           | Range       |
| Intensity | 12 | Nucleus hematoxylin intensity features.                                     | Min          |                           | 2 | Inverse difference moment: A measure of homogeneity       | Mean        |
|           |    |                                                                             | Max          |                           | 2 |                                                           | Range       |
|           |    |                                                                             | Mean         |                           | 4 | Sum average & Sum variance for all features               | Mean        |
|           |    |                                                                             | Median       |                           | 4 |                                                           | Range       |
|           |    |                                                                             | MeanMed.Diff |                           | 2 | Sum entropy features                                      | Mean        |
|           |    |                                                                             | Std          |                           | 2 |                                                           | Range       |
|           |    |                                                                             | IQR          |                           | 2 | Entropy                                                   | Mean        |
|           |    |                                                                             | MAD          |                           | 2 |                                                           | Range       |
|           |    |                                                                             | Skewness     |                           | 4 | Difference variance & Difference entropy                  | Mean        |
|           |    |                                                                             | Kurtosis     |                           | 4 |                                                           | Range       |
|           |    |                                                                             | HistEnergy   |                           | 4 | Information Measure of Correlation (IMC) (2 types)        | Mean        |
|           |    |                                                                             | HistEntropy  |                           | 4 |                                                           | Range       |

## Supplementary Figures

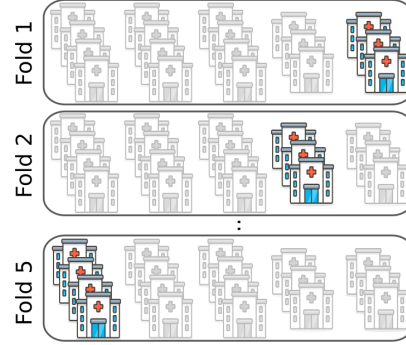

**Fig. S1.** Internal-external cross-validation procedure. The TCGA dataset originates from multiple institutions, and we used this fact to obtain an estimate of the external analytic validity of our models. Fold 1 was used for tuning hyper parameters, while folds 4-5 were used as external testing sets.

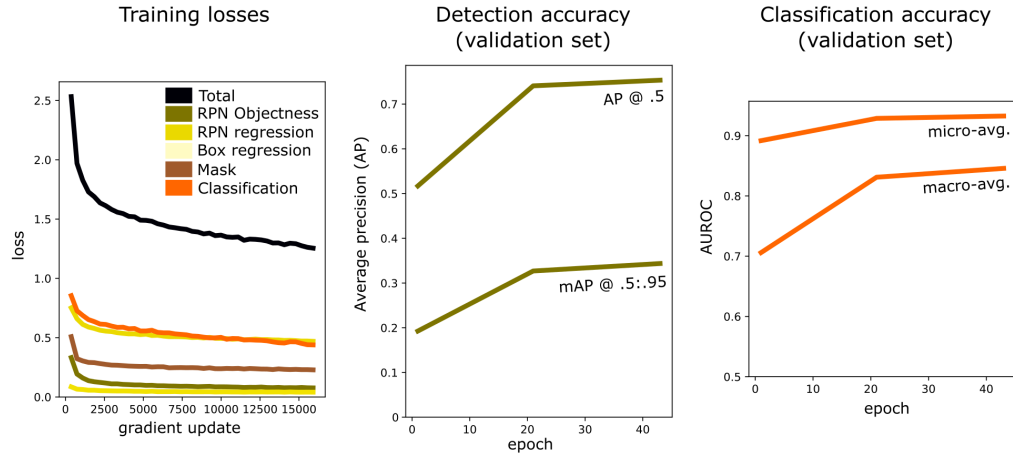

**Fig. S2.** Progression of NuCLS model training and convergence on fold 1. Our prototyping experiments on fold 1 (not shown) showed that the detection model started overfitting after 15k detection updates, so we froze detection weights after 15k iterations and allowed 1k extra iterations for fine-tuning of the classification layers. Abbreviations: RPN, region proposal network; AP@.5, average precision when a threshold of 0.5 is used for considering a detection to be true; mAP@.5:.95, mean average precision at a range of detection thresholds between 0.5 and 0.95; AUROC, area under receiver-operator characteristics curve.

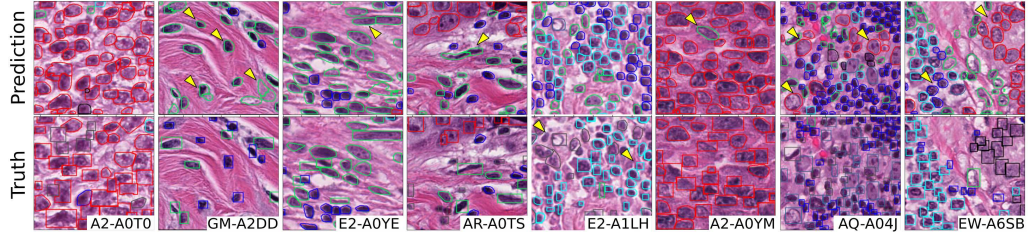

**Fig. S3.** Additional examples showing qualitative performance of NuCLS model on testing sets. The displayed ground truth comes from the pathologist-corrected single-rater dataset. The images are representative of a number of different hospitals in each of the testing sets from the cross-validation scheme. Detection and classification performance closely matches the ground truth, and discrepancies are marked by arrows. Not all discrepancies are algorithmic errors, including: *i.* adjacent nuclei that could conceivably be viewed as a single nucleus; *ii.* missing annotations; *iii.* morphologically ambiguous nuclei. Some errors arise from the lack of incorporation of contextual information in our models. Without low power context, macrophages and normal ductal/acinar cells may look morphologically similar to tumor cells.

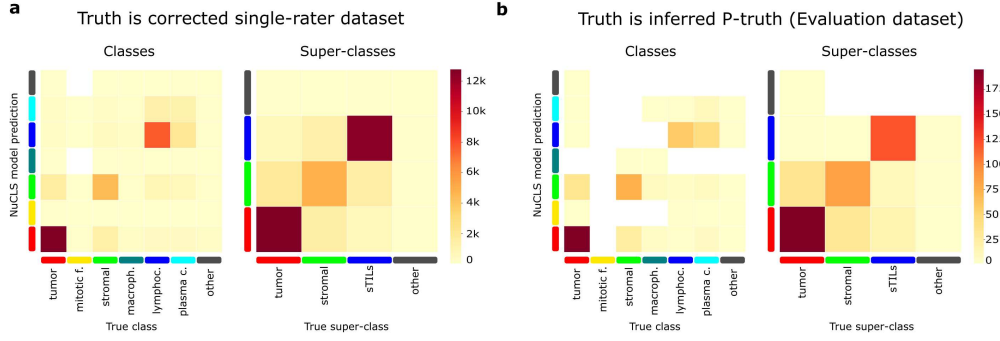

**Fig. S4.** Confusion matrix of NuCLS model predictions on the testing sets. For each of folds 2-5, the NuCLS model trained on the single-rater dataset training slides was used to predict FOVs from the corresponding testing set slides. The counts shown are aggregated over all testing sets. a. The single-rater dataset is considered to be the truth. b. Inferred truth from pathologists (inferred P-truth) on the multi-rater Evaluation dataset is considered to be the truth.

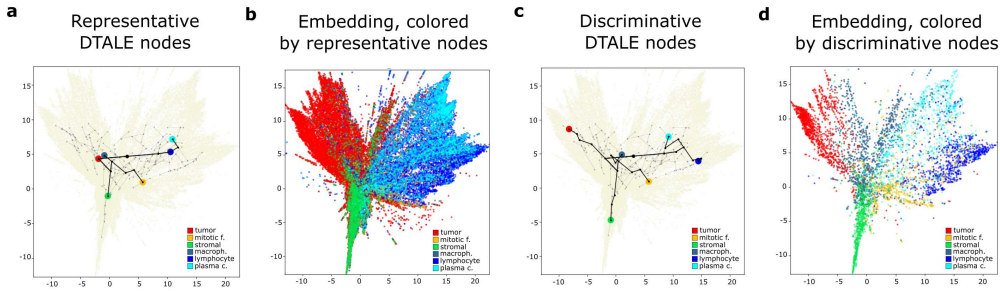

**Fig. S5.** Representative vs discriminative approximation of NuCLS model decisions using DTALE. a. Overlay of the full DTALE tree (light gray) on top of the embedding to which it was fitted. In black, we show paths to the nodes that allow representative approximation of NuCLS decisions, i.e. highest F-1 score. b. Nuclei that correspond to representative DTALE nodes. c. DTALE nodes that correspond to the most discriminative approximation of the NuCLS decisions, i.e. highest precision. d. Nuclei that correspond to discriminative DTALE nodes.
